# Supplementary material for: mtDNA variability determines spontaneous joint aging damage in a conplastic mouse model
Source: publisher site journal article supplement (doi:10.18632/aging.204153), 2022-07-02
Supplement: Supplementary file [file aging-v14-204153-supplementary-material-SD1.pdf]

## SUPPLEMENTARY FIGURES

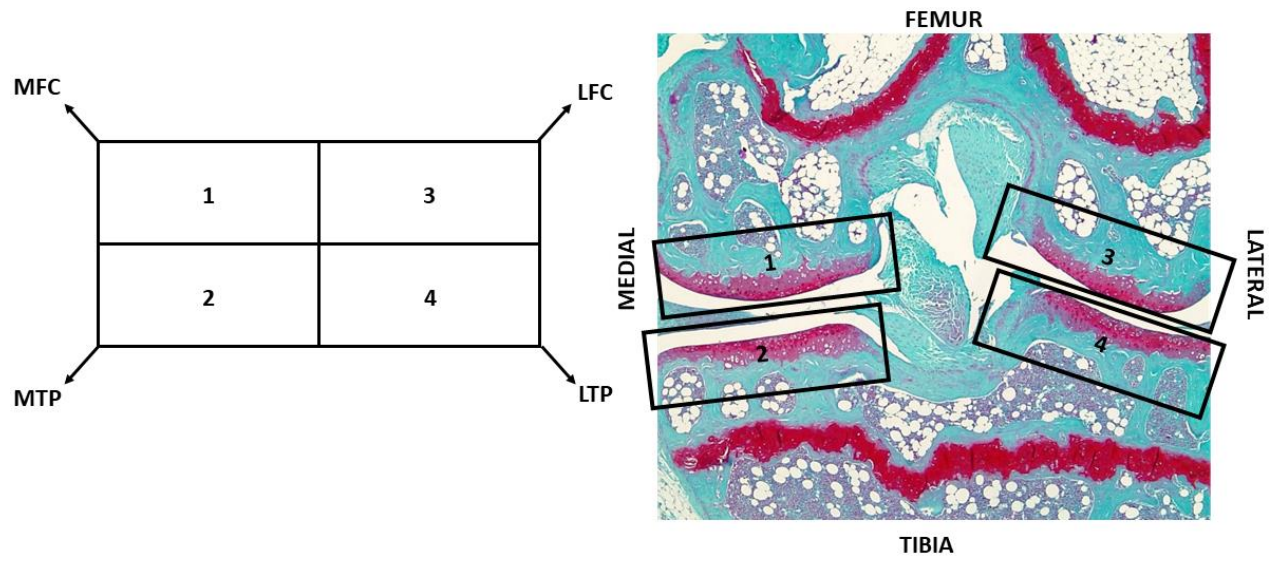

**Supplementary Figure 1. Coronal section analysis for Mankin score measurement.** TP (tibial plateau) = MTP+LTP; FC (femoral condyle) = MTP+LFC; medial compartment= MTP+MFC; lateral compartment = LTP+LFC; whole joint: medial compartment + lateral compartment.

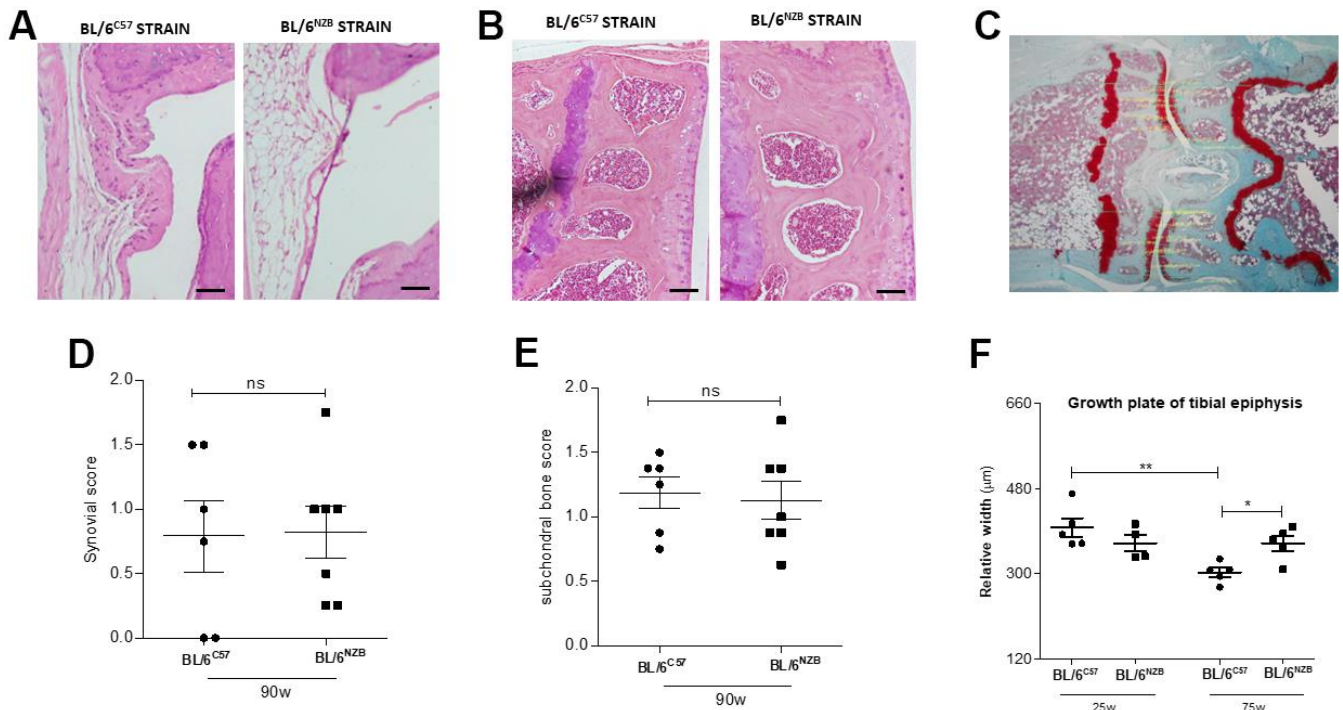

**Supplementary Figure 2. Histopathological evaluation of synovial tissue and subchondral bone and histomorphometric analysis of growth plate of tibial epiphysis.** Representative images of synovial tissue (A) and subchondral bone (B) from joint sections of BL/6<sup>CS7</sup> and conplastic (BL/6<sup>NZB</sup>) mice at 90 weeks of age stained with Hematoxylin-Eosin. Histopathological changes in the synovium (D) and subchondral bone (E) were graded by semi-quantitative scoring system (<https://doi.org/10.1111/j.1365-2559.2006.02508.x>; <https://doi.org/10.1371/journal.pone.0173726>; respectively). Original magnification: 20×. Scale bar, 100 μm. Graphs represent means ± SEM; n=6 in BL/6<sup>CS7</sup> and n=7 in conplastic (BL/6<sup>NZB</sup>) mice. (C, F) Histomorphometric analysis of growth plate of tibial epiphysis from joint sections of BL/6<sup>CS7</sup> and conplastic (BL/6<sup>NZB</sup>) mice at 25 and 75 weeks. Representative image of analysis performed with Software NIS Elements associated to the microscope NIKON (BX61). Graphs represent means ± SEM; n=5 in BL/6<sup>CS7</sup> and n=4 in conplastic (BL/6<sup>NZB</sup>) mice at 25 weeks; n=5 in BL/6<sup>CS7</sup> and conplastic (BL/6<sup>NZB</sup>) mice at 75 weeks. ns=not significant, \*p<0.05, \*\*p<0.01 by non-parametric Mann-Whitney test.

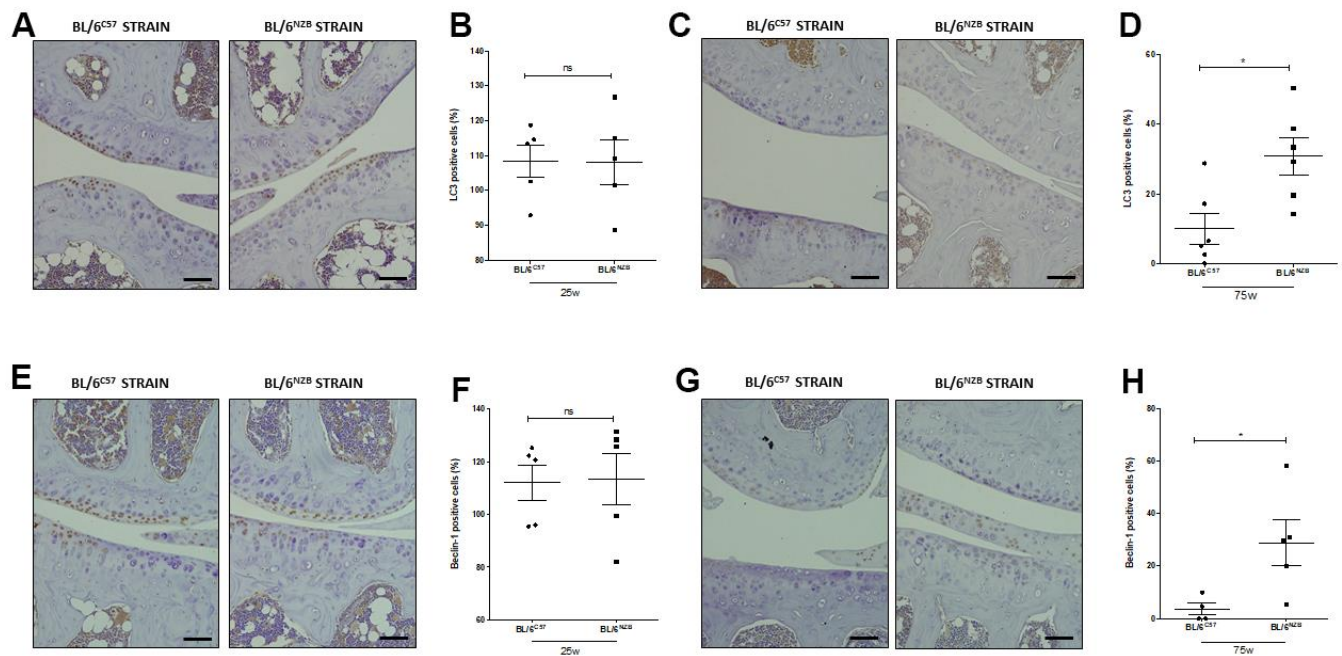

**Supplementary Figure 3. LC3 and Beclin-1 expression in cartilage from mice at 25 and 75 weeks of age.** Representative images of medial compartment of knee joints from BL/6<sup>CS7</sup> and conplastic (BL/6<sup>NZB</sup>) mice at 25 weeks (A) and 75 weeks (C) of age stained with LC3. Quantitative analysis of LC3-positive cells of knee joints from BL/6<sup>CS7</sup> and conplastic (BL/6<sup>NZB</sup>) mice at 25 weeks (B) and 75 weeks (D) of age. 25 weeks: n=5 in BL/6<sup>CS7</sup> and n=5 conplastic (BL/6<sup>NZB</sup>) mice; 75 weeks: n=6 in BL/6<sup>CS7</sup> and n=6 conplastic (BL/6<sup>NZB</sup>) mice. Representative images of medial compartment of knee joints from BL/6<sup>CS7</sup> and conplastic (BL/6<sup>NZB</sup>) mice at 25 weeks (E) 75 weeks (G) of age stained with Beclin-1. Quantitative analysis of Beclin-1-positive cells of knee joints from BL/6<sup>CS7</sup> and conplastic (BL/6<sup>NZB</sup>) mice at 25 weeks (F) 75 weeks (H) of age. 25 weeks: n=5 in BL/6<sup>CS7</sup> and n=5 conplastic (BL/6<sup>NZB</sup>) mice; 75 weeks: n=4 in BL/6<sup>CS7</sup> and n=5 conplastic (BL/6<sup>NZB</sup>) mice. Original magnification: 20×. Scale bar, 50 μm. Graphs represent means ± SEM. ns=not significant, \*p<0.05 by non-parametric Mann-Whitney test.

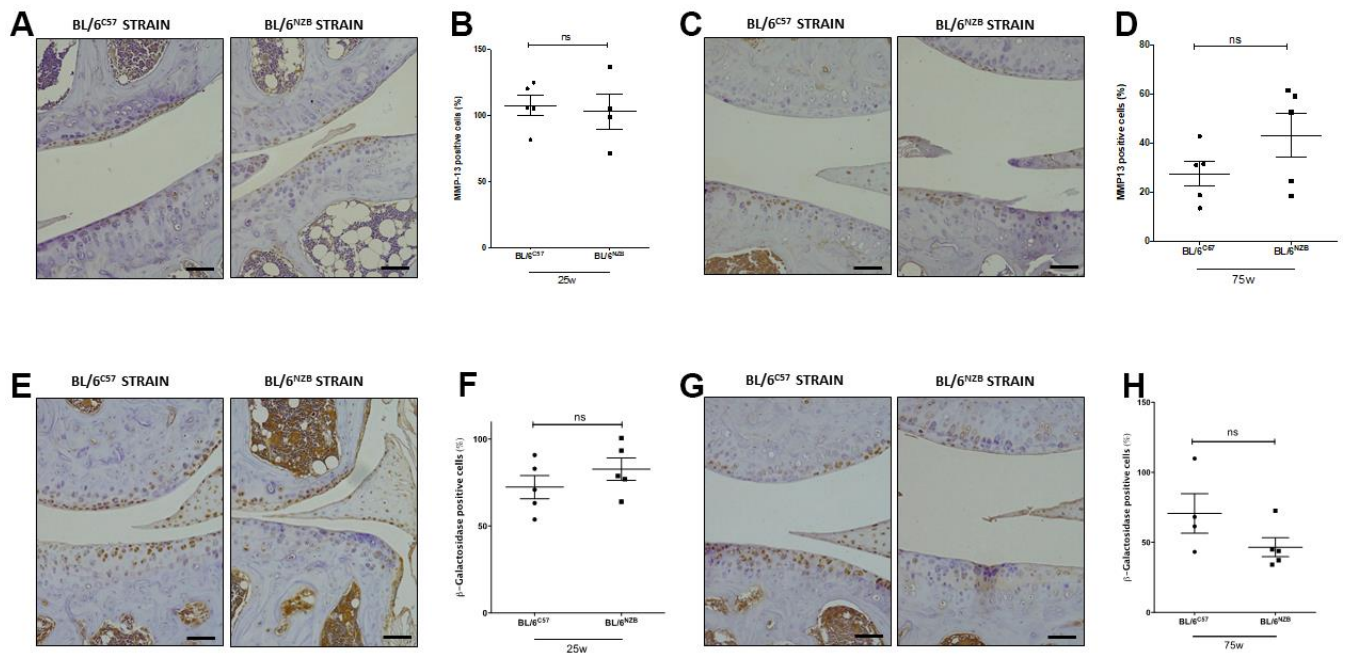

**Supplementary Figure 4. Immunohistochemistry for MMP13 and  $\beta$ -Galactosidase in mice at 25 and 75 weeks.** Representative images of medial compartment of knee joints from BL/6<sup>CS7</sup> and conplastic (BL/6<sup>NZB</sup>) mice at 25 weeks (A) and 75 weeks (C) of age stained with MMP13. Quantitative analysis of MMP13-positive cells of knee joints from BL/6<sup>CS7</sup> and conplastic (BL/6<sup>NZB</sup>) mice at 25 weeks (B) and 75 weeks (D) of age. 25 weeks: n=5 in BL/6<sup>CS7</sup> and n=4 conplastic (BL/6<sup>NZB</sup>) mice; 75 weeks: n=5 in BL/6<sup>CS7</sup> and n=5 conplastic (BL/6<sup>NZB</sup>) mice. Representative images of medial compartment of knee joints from BL/6<sup>CS7</sup> and conplastic (BL/6<sup>NZB</sup>) mice at 25 weeks (E) and 75 weeks (G) of age stained with  $\beta$ -Galactosidase. Quantitative analysis of  $\beta$ -Galactosidase-positive cells of knee joints from BL/6<sup>CS7</sup> and conplastic (BL/6<sup>NZB</sup>) mice at 25 weeks (F) and 75 weeks (H) of age. 25 weeks: n=5 in BL/6<sup>CS7</sup> and n=5 conplastic (BL/6<sup>NZB</sup>) mice; 75 weeks: n=4 in BL/6<sup>CS7</sup> and n=5 conplastic (BL/6<sup>NZB</sup>) mice. Original magnification: 20 $\times$ . Scale bar, 50  $\mu$ m. Graphs represent means  $\pm$  SEM; ns=not significant by non-parametric Mann-Whitney test.

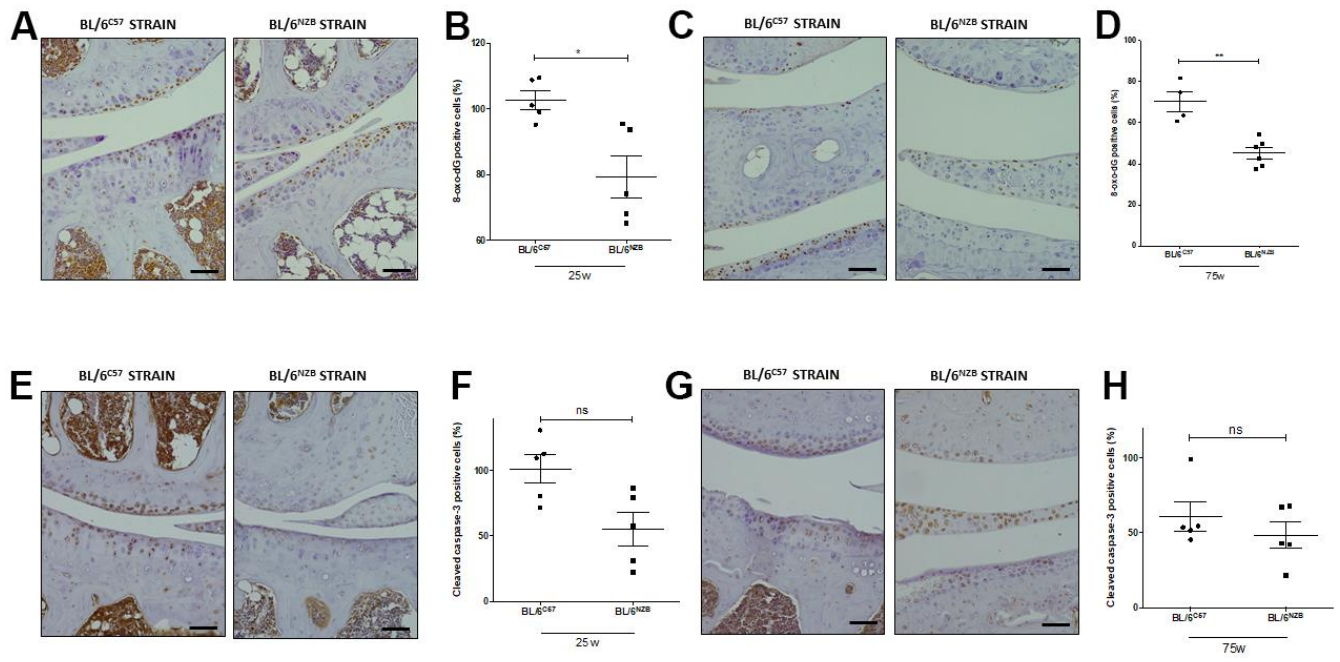

**Supplementary Figure 5. 8-oxo-dG cartilage and cleaved caspase-3 expression in conplastic mice at 25 and 75 weeks.** Representative images of medial compartment of knee joints from BL/6<sup>C57</sup> and conplastic (BL/6<sup>NZB</sup>) mice at 25 weeks (A) and 75 weeks (C) of age stained with 8-oxo-dG. Quantitative analysis of 8-oxo-dG-positive cells of knee joints from BL/6<sup>C57</sup> and conplastic (BL/6<sup>NZB</sup>) mice at 25 weeks (B) and 75 weeks (D) of age. 25 weeks: n=5 in BL/6<sup>C57</sup> and n=5 conplastic (BL/6<sup>NZB</sup>) mice; 75 weeks: n=4 in BL/6<sup>C57</sup> and n=6 conplastic (BL/6<sup>NZB</sup>) mice. Representative images of medial compartment of knee joints from BL/6<sup>C57</sup> and conplastic (BL/6<sup>NZB</sup>) mice at 25 week (E) 75 weeks (G) of age stained with cleaved caspase-3. Quantitative analysis of cleaved caspase-3 -positive cells of knee joints from BL/6<sup>C57</sup> and conplastic (BL/6<sup>NZB</sup>) mice at 25 weeks (F) and 75 weeks of age (H). 25 weeks: n=5 in BL/6<sup>C57</sup> and n=5 conplastic (BL/6<sup>NZB</sup>) mice, 75 weeks: n=5 in BL/6<sup>C57</sup> and n=5 conplastic (BL/6<sup>NZB</sup>) mice. Original magnification: 20×. Scale bar, 50 μm. Graphs represent means ± SEM; ns=not significant, \*p<0.05, \*\*p<0.01 by non-parametric Mann-Whitney test.
